# Supplementary material for: Employing denaturation for rapid electrochemical detection of myoglobin using TiO2 nanotubes
Source: Royal Society of Chemistry journal article supplement (doi:10.1039/c3tb20409j), 2013-01-01
Supplement: c3tb20409j.pdf [file c3tb20409j.pdf]

### Supporting Information

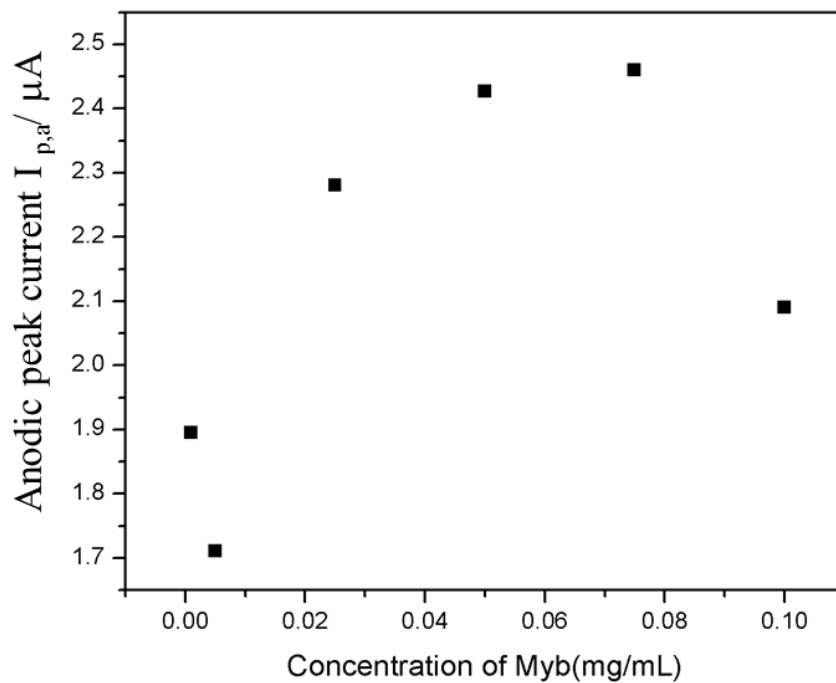

Figure 1: The plot of anodic peak current ( $I_{p,a}$ ) vs concentration of Mb with degussa P-25 modified (Ti-NP) modified GCE

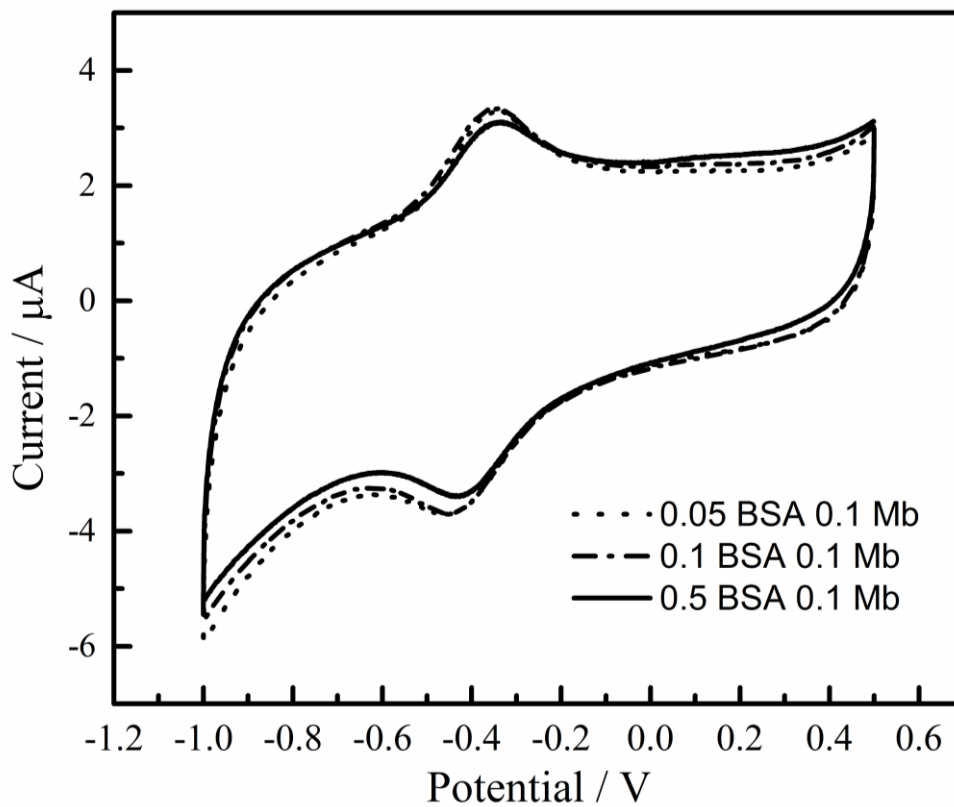

Figure 2: Cyclic voltammogram of Bovine serum albumin (BSA) with its concentration varying between 0.05-0.5 mg ml<sup>-1</sup> using a fixed concentration of Mb (0.1 mg ml<sup>-1</sup>) in a solution of 3.5 M GdnHCl.

Table 1. showing the comparison between the various reported immunosensors for Mb and Ti-NT based sensor demonstrated here.

| Material constituting the biosensor                                                | Detection limit | Ref no                 |
|------------------------------------------------------------------------------------|-----------------|------------------------|
| Polyaniline nanowire modified electrode                                            | 1.4 ng/ml       | 1                      |
| Screen printed electrodes modified with anti-myoglobin antibody                    | 85 ng/ml        | 2                      |
| Methylene blue-multiwalled carbon nanotube hybrid electrode                        | 0.3 ng/ml       | 3                      |
| metal nanoparticles stabilized by didodecyldimethylammonium bromide and antibodies | 5-10 ng/ml      | 6(in manuscript),<br>4 |
| Ti-NT based sensor                                                                 | 1000 ng/ml      |                        |

1. I. Lee, X. Luo, X. T. Cui, M. Yun, *Biosens. Bioelectrons.* 2011, **26**, 3297.
2. T. M. O'Regan, L. J. O'Riordan, M. Pravda, C. K. O'Sullivan, G. G. Guilbault, *Anal. Chim. Acta.* 2002, **460**, 141.
3. S. Pakapongpan, R. Palangsuntikul, W. Surareungchai, *Electrochim.Acta.* 2011, **56**, 6831.
4. E. Suprun, T. Bulko, A. Lisitsa, O. Gnedenko, A. Ivanov, V. Shumyantseva, A. Archakov, *Biosens. Bioelectron.* 2010, **25**, 1694.
